# Supplementary material for: Design and Synthesis of Hsp90 Inhibitors with B‐Raf and PDHK1 Multi‐Target Activity
Source: PubMed Central journal article supplement — ChemistryOpen. 2021 Oct 11;10(12):1177–85. doi: 10.1002/open.202100131 (PMC8634768; doi:10.1002/open.202100131), 2021-10-11
Supplement: OPEN-10-1177-s001.pdf [file OPEN-10-1177-s001.pdf]

# ChemistryOpen

Supporting Information

## **Design and Synthesis of Hsp90 Inhibitors with B-Raf and PDHK1 Multi-Target Activity**

Luca Pinzi, Francesca Foschi, Michael S. Christodoulou, Daniele Passarella, and Giulio Rastelli\*

## TABLE OF CONTENTS

### Figures

|                 |    |
|-----------------|----|
| Figure S1 ..... | S2 |
| Figure S2 ..... | S3 |
| Figure S3 ..... | S4 |
| Figure S4 ..... | S5 |
| Figure S5 ..... | S6 |

### Tables

|                |     |
|----------------|-----|
| Table S1 ..... | S7  |
| Table S2 ..... | S8  |
| Table S3 ..... | S9  |
| Table S4 ..... | S10 |
| Table S5 ..... | S11 |

|                                       |     |
|---------------------------------------|-----|
| <b>Chemoinformatic analyses</b> ..... | S12 |
|---------------------------------------|-----|

**Figure S1:** Chemical structures of the designed compounds.

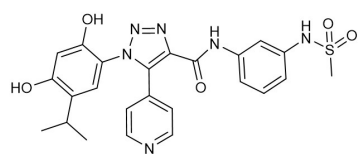

4a

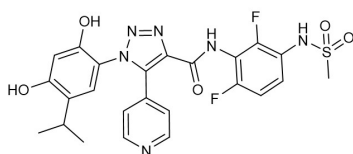

4b

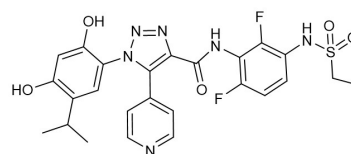

4c

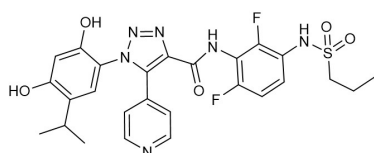

4d

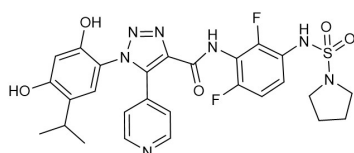

4e

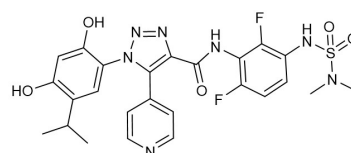

4f

**Figure S2:** Dose-response curves of compounds **4a-4e** and the controls tested for the inhibition of the three targets. Titration curves are not reported for compounds that resulted to be inactive in the assays.

### Hsp90

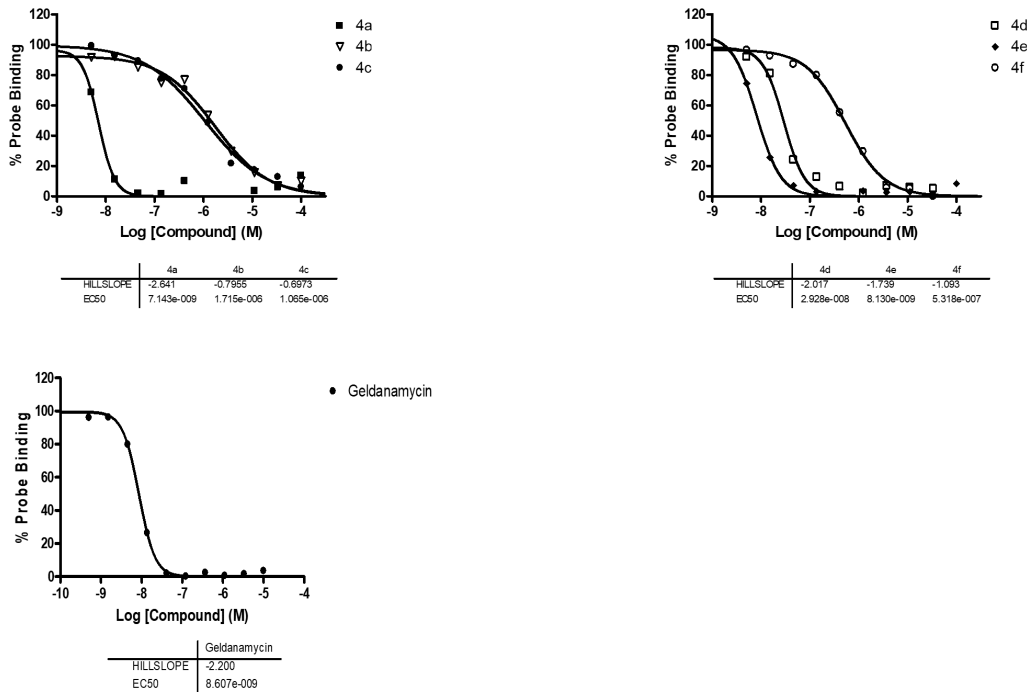

### B-Raf<sup>WT</sup> / B-Raf<sup>V600E</sup>

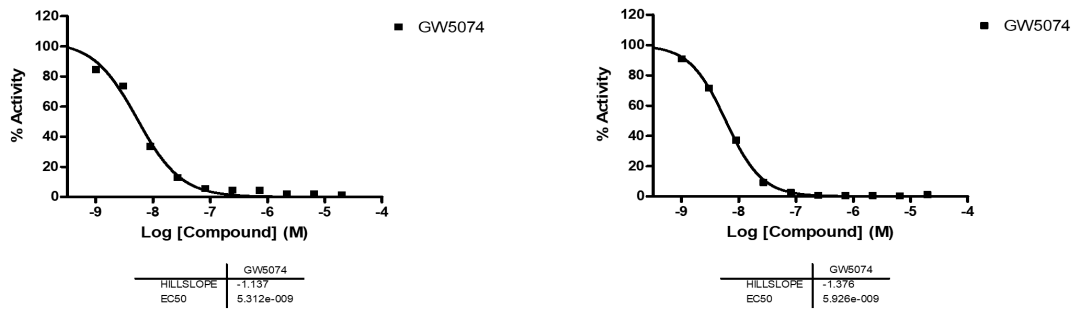

### PDHK1

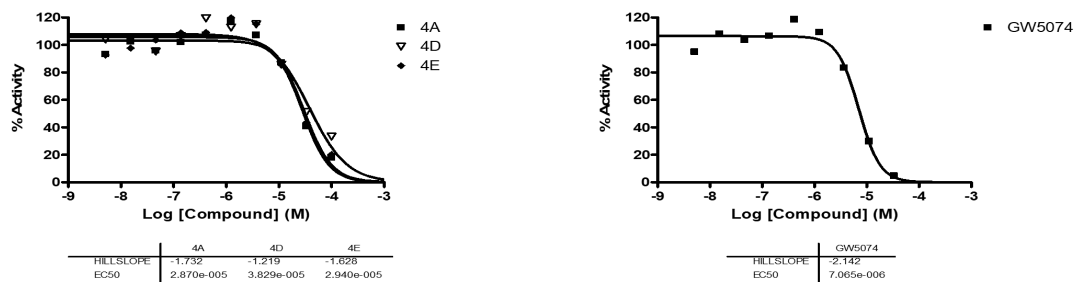

**Figure S3.** Schematic representation of the main hydrogen bond interactions sampled by MD for the complexes Hsp90-**4a**, Hps90-**4b** and Hsp90-**4e** (left panels), and their corresponding representative binding modes (right panels). The 3D illustration of each ligand-protein complex was created with UCSF Chimera (version 1.14).

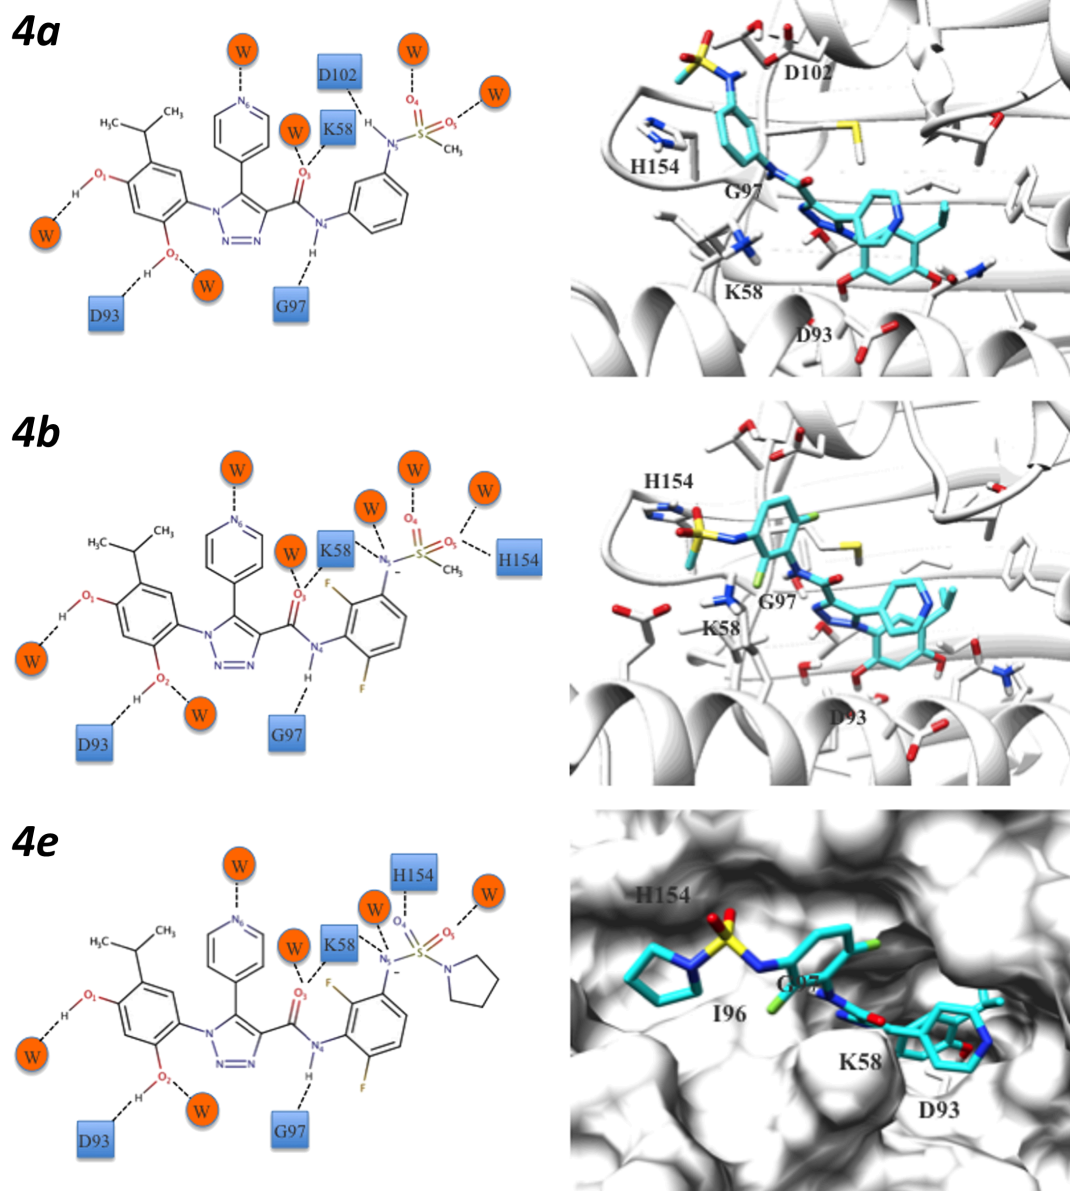

**Figure S4:** Schematic representation of the main hydrogen bonds observed between compound **4e** and B-Raf in the docked (panels *a* and *b*) and MD complexes (panel *c*). The docked ligand is shown in cyan in the *c* panel, while the ligand resulting from MD is represented as green sticks, their RMSD being higher than 6Å.

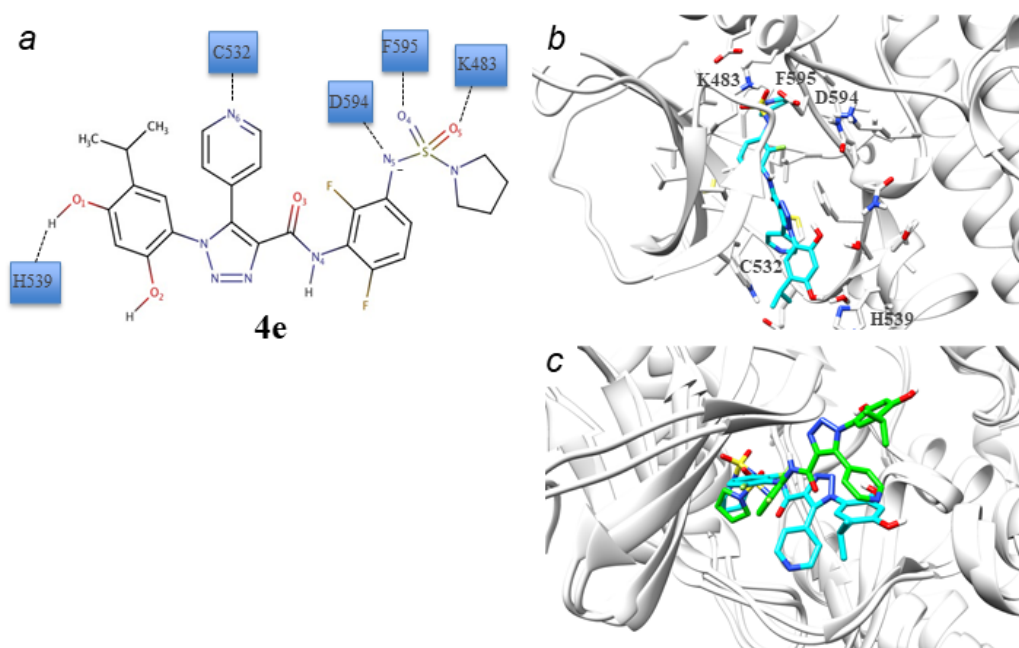

**Figure S5.** Schematic representation of the main hydrogen bond interactions sampled by MD of complexes PDHK1-**4a** and PDHK1-**4e** (left panels), and their corresponding representative binding modes (right panels). The 3D illustration of each ligand-protein complex was created with UCSF Chimera (version 1.14).

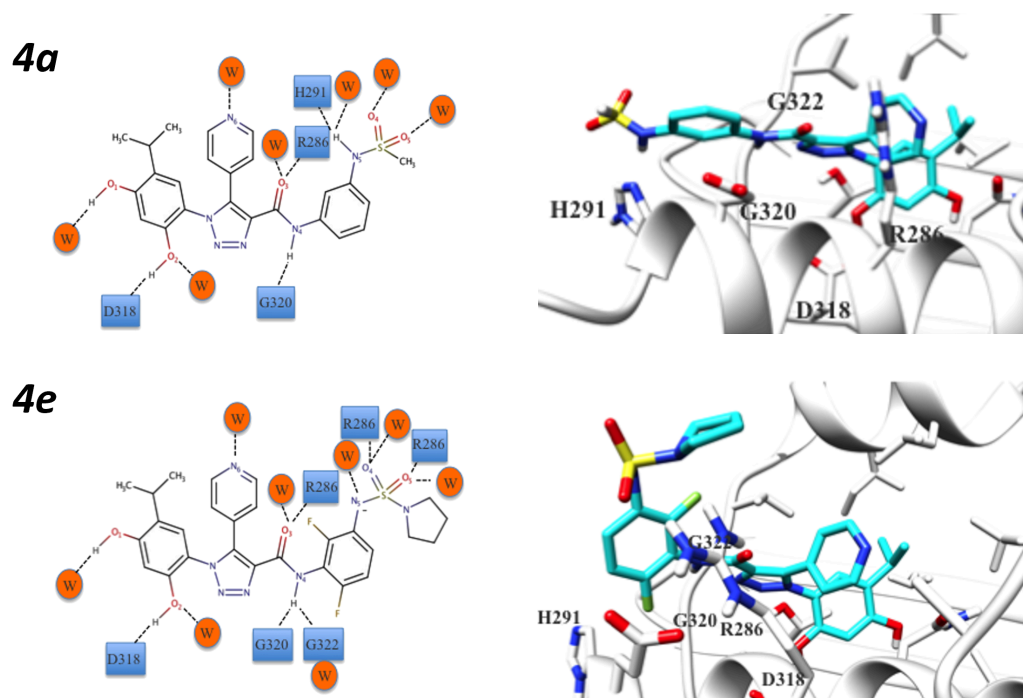

**Table S1.** pKa predictions made for compounds **4a-4f** with Epik (Schrödinger Suite 2020-1).

| <b>Compound ID</b> | <b>pKa</b> |
|--------------------|------------|
| <b>4a</b>          | 8.1        |
| <b>4b</b>          | 7.3        |
| <b>4c</b>          | 7.3        |
| <b>4d</b>          | 7.4        |
| <b>4e</b>          | 6.8        |
| <b>4f</b>          | 6.5        |



**Table S2.** IFD docking scores (kcal/mol) of compounds **4a-4f** into Hsp90 $\alpha$  (PDB code 2VCI), B-Raf<sup>WT</sup> (PDB code 3D4Q) and PDHK1 (PDB code 2Q8G).

| <b>Compound ID</b> | <b>Hsp90<math>\alpha</math></b> | <b>B-Raf<sup>WT</sup></b> | <b>PDHK1</b> |
|--------------------|---------------------------------|---------------------------|--------------|
| <b>4a</b>          | -11.7                           | -9.8                      | -10.5        |
| <b>4b</b>          | -10.8                           | -9.4                      | -9.5         |
| <b>4c</b>          | -8.7                            | -10.9                     | -8.7         |
| <b>4d</b>          | -11.1                           | -12.0                     | -9.1         |
| <b>4e</b>          | -11.0                           | -12.5                     | -10.1        |
| <b>4f</b>          | -11.0                           | -9.4                      | -9.0         |

**Table S3.** Results of the cytotoxicity predictions made with the CLC-pred webserver (A.A. Lagunin et al. DOI: <https://doi.org/10.1371/journal.pone.0191838>). Only cytotoxic activities predicted with a probability score  $P_a$  higher than 0.3 are reported in the table. The probability of a compound to be classified as not cytotoxic (*i.e.*, inactive) is represented by the  $P_i$  value. Compounds with a  $P_a$  value higher than the corresponding  $P_i$  can be considered as potentially cytotoxic for a given cancer cell line. Cytotoxic activities with  $P_a \geq 0.3$  were not detected on normal human cell lines.

| <b>Compound ID</b> | <b><math>P_a</math></b> | <b><math>P_i</math></b> | <b>Cell line ID</b> | <b>Cell line name</b>               | <b>Tissue - Organ</b> |
|--------------------|-------------------------|-------------------------|---------------------|-------------------------------------|-----------------------|
| 4a                 | 0.592                   | 0.011                   | NCI-H460            | Non-small cell lung carcinoma       | Lung                  |
| 4a                 | 0.375                   | 0.095                   | NCI-H187            | Small cell lung carcinoma           | Lung                  |
| 4a                 | 0.361                   | 0.164                   | SK-MEL-1            | Metastatic melanoma                 | Skin                  |
| 4a                 | 0.366                   | 0.171                   | NCI-H838            | Non-small cell lung cancer. 3 stage | Lung                  |
| 4a                 | 0.307                   | 0.129                   | U-266               | Plasma cell myeloma                 | Blood                 |
| 4b                 | 0.502                   | 0.02                    | NCI-H460            | Non-small cell lung carcinoma       | Lung                  |
| 4b                 | 0.304                   | 0.146                   | A2058               | Melanoma                            | Skin                  |
| 4b                 | 0.335                   | 0.212                   | NCI-H838            | Non-small cell lung cancer. 3 stage | Lung                  |
| 4b                 | 0.325                   | 0.235                   | SK-MEL-1            | Metastatic melanoma                 | Skin                  |
| 4c                 | 0.471                   | 0.023                   | NCI-H460            | Non-small cell lung carcinoma       | Lung                  |
| 4c                 | 0.347                   | 0.094                   | A2058               | Melanoma                            | Skin                  |
| 4d                 | 0.432                   | 0.038                   | A2058               | Melanoma                            | Skin                  |
| 4d                 | 0.42                    | 0.031                   | NCI-H460            | Non-small cell lung carcinoma       | Lung                  |
| 4d                 | 0.302                   | 0.069                   | SK-MEL-28           | Melanoma                            | Skin                  |
| 4d                 | 0.314                   | 0.108                   | PA-1                | Ovarian carcinoma                   | Ovarium               |
| 4d                 | 0.314                   | 0.258                   | SK-MEL-1            | Metastatic melanoma                 | Skin                  |
| 4e                 | 0.4                     | 0.035                   | NCI-H460            | Non-small cell lung carcinoma       | Lung                  |
| 4e                 | 0.308                   | 0.087                   | HCT-116             | Colon carcinoma                     | Colon                 |
| 4e                 | 0.317                   | 0.251                   | SK-MEL-1            | Metastatic melanoma                 | Skin                  |
| 4f                 | 0.396                   | 0.036                   | NCI-H460            | Non-small cell lung carcinoma       | Lung                  |
| 4f                 | 0.369                   | 0.059                   | HCT-116             | Colon carcinoma                     | Colon                 |
| 4f                 | 0.309                   | 0.269                   | SK-MEL-1            | Metastatic melanoma                 | Skin                  |

**Table S4.** Percentages of occurrence and hydrogen bonding distances between Hsp90 and ligands **4a**, **4b** and **4e** in the 100 ns molecular dynamics simulations.

| <i>Hydrogen bonds with protein amino acids</i> | <i>Occur. (%)</i> | <i>Dist. (Å)</i> | <i>Hydrogen bonds with waters</i> | <i>Occur. (%)</i> | <i>Dist. (Å)</i> |
|------------------------------------------------|-------------------|------------------|-----------------------------------|-------------------|------------------|
| <b>4a</b>                                      |                   |                  |                                   |                   |                  |
| O <sub>2</sub> H---D93                         | 99.5              | 2.7              | O <sub>4</sub> ---Wat             | 106               | 2.8              |
| N <sub>5</sub> H---D102                        | 94                | 2.8              | O <sub>1</sub> H---Wat            | 93                | 2.8              |
| N <sub>4</sub> -H---G97                        | 80                | 2.8              | O <sub>5</sub> ---Wat             | 87                | 2.8              |
| O <sub>3</sub> ---K58                          | 5                 | 2.8              | N <sub>6</sub> ---Wat             | 66                | 2.8              |
| O <sub>3</sub> ---Wat                          | 120               |                  | O <sub>2</sub> ---Wat             | 38                | 2.8              |
| <b>4b</b>                                      |                   |                  |                                   |                   |                  |
| O <sub>2</sub> H---D93                         | 99.6              | 2.7              | O <sub>5</sub> ---Wat             | 162               | 2.8              |
| N <sub>4</sub> -H---G97                        | 36                | 2.9              | O <sub>3</sub> ---Wat             | 96                | 2.8              |
| O <sub>3</sub> ---K58                          | 17                | 2.8              | O <sub>1</sub> H---Wat            | 92                | 2.8              |
| N <sub>5</sub> ---K58                          | 11                | 2.9              | N <sub>5</sub> ---Wat             | 87                | 2.8              |
| O <sub>5</sub> ---H154                         | 7                 | 2.9              | N <sub>6</sub> ---Wat             | 72                | 2.8              |
| O <sub>4</sub> ---Wat                          | 164               | 2.8              | O <sub>2</sub> ---Wat             | 37                | 2.8              |
| <b>4e</b>                                      |                   |                  |                                   |                   |                  |
| O <sub>2</sub> H---D93                         | 99                | 2.7              | O <sub>4</sub> ---Wat             | 130               | 2.8              |
| N <sub>4</sub> -H---G97                        | 44                | 2.9              | O <sub>3</sub> ---Wat             | 94                | 2.8              |
| O <sub>3</sub> ---K58                          | 23                | 2.8              | O <sub>1</sub> H---Wat            | 92                | 2.8              |
| N <sub>5</sub> ---K58                          | 16                | 2.9              | N <sub>5</sub> ---Wat             | 75                | 2.8              |
| O <sub>4</sub> ---H154                         | 15                | 2.8              | N <sub>7</sub> ---Wat             | 66                | 2.8              |
| O <sub>5</sub> ---H154                         | 7                 | 2.9              | O <sub>2</sub> ---Wat             | 37                | 2.8              |
| O <sub>5</sub> ---Wat                          | 176               | 2.8              | N <sub>6</sub> ---Wat             | 36                | 2.8              |

Note: Hydrogen bonds with % occurrence < 5% are not reported. The hydrogen bond distances reported in Å are related to the distance between the donor and acceptor heteroatoms.

**Table S5:** Percentages of occurrence and hydrogen bonding distances between PDHK1 and ligands **4a** and **4e** in the 100 ns molecular dynamics simulations.

| <i>Hydrogen bonds with protein amino acids</i> | <i>Occur. (%)</i> | <i>Dist. (Å)</i> | <i>Hydrogen bonds with waters</i> | <i>Occur. (%)</i> | <i>Dist. (Å)</i> |
|------------------------------------------------|-------------------|------------------|-----------------------------------|-------------------|------------------|
| <b>4a</b>                                      |                   |                  |                                   |                   |                  |
| O <sub>2</sub> H---D318                        | 99.6              | 2.6              | O <sub>1</sub> H---Wat            | 94                | 2.8              |
| O <sub>3</sub> ---R286                         | 43                | 2.8              | O <sub>3</sub> ---Wat             | 66                | 2.8              |
| N <sub>5</sub> H---H291                        | 30                | 2.9              | N <sub>6</sub> ---Wat             | 50                | 2.8              |
| N <sub>4</sub> H---G320                        | 4                 | 2.9              | N <sub>5</sub> H---Wat            | 38                | 2.8              |
|                                                |                   |                  | O <sub>2</sub> ---Wat             | 19                | 2.8              |
|                                                |                   |                  | O <sub>4</sub> ---Wat             | 99.5              | 2.8              |
|                                                |                   |                  | O <sub>5</sub> ---Wat             | 96                | 2.8              |
| <b>4e</b>                                      |                   |                  |                                   |                   |                  |
| O <sub>2</sub> H---D318                        | 99.6              | 2.6              | O <sub>4</sub> ---Wat             | 141               | 2.8              |
| O <sub>5</sub> ---R286                         | 34                | 2.8              | O <sub>3</sub> ---Wat             | 113               | 2.8              |
| O <sub>3</sub> ---R286                         | 15                | 2.8              | O <sub>1</sub> H---Wat            | 93                | 2.7              |
| N <sub>4</sub> H---G320                        | 9                 | 2.9              | N <sub>5</sub> ---Wat             | 93                | 2.8              |
| N <sub>4</sub> H---G322                        | 5                 | 2.8              | N <sub>7</sub> ---Wat             | 61                | 2.8              |
| O <sub>4</sub> ---R286                         | 5                 | 2.8              | N <sub>6</sub> ---Wat             | 36                | 2.8              |
|                                                |                   |                  | N <sub>4</sub> H---Wat            | 22                | 2.8              |
|                                                |                   |                  | O <sub>2</sub> ---Wat             | 11                | 2.8              |
|                                                |                   |                  | O <sub>5</sub> ---Wat             | 146               | 2.8              |

Note: Hydrogen bonds with % occurrence < 5% are not reported. The hydrogen bond distances reported in Å are related to the distance between the donor and acceptor heteroatoms.

## Chemoinformatic analyses

Chemoinformatic analyses were performed for selected compounds of PDHK1,<sup>[1]</sup> Hsp90<sup>[2]</sup> and B-Raf,<sup>[3-5]</sup> with the aim of identifying privileged substructures and chemical frameworks, useful for the design of multi-target ligands. Chemoinformatic analyses, which included 2D similarity estimations, were performed by using the RDKit Python libraries (<https://www.rdkit.org> - release 2020-9). In particular, 2D similarity estimations were performed with two different types of fingerprints (*i.e.*, MACCS and ECFP4) to take into account different aspects of chemical similarity. Records that provided similarity values above commonly accepted thresholds (*i.e.*, MACCS  $\geq 0.8$  and ECFP4  $\geq 0.3$ ) were retained and visually inspected.<sup>[6]</sup> Interestingly, the 2D fingerprints-based estimations performed between Hsp90 and PDHK1 selected ligands, highlighted several records with similarity values above threshold both in terms of MACCS and ECFP4 fingerprints (**Table A**), clearly demonstrating that these targets present overlapping chemical spaces.

Slightly different results were obtained in the comparisons of Hsp90 and PDHK1 ligands, with known B-Raf inhibitors, which provided a number of records with a high degree of ECFP4 similarity. These results showed that B-Raf ligands overall present similar structural connectivity, with respect to Hsp90 and PDHK1 known inhibitors, several of the observed ECFP4 values resulting above accepted thresholds in the analyses (**Table A**).

**Table A:** Top20- scoring 2D similarity records obtained from the comparison of selected Hsp90, PDHK1 ad B-Raf ligands. Ligands are reported by means of their identifiers in the ChEMBL database.<sup>[7]</sup>

| <i>Hsp90 (Target A) vs PDHK1 (Target B)</i> |                        |                                 |                                 |
|---------------------------------------------|------------------------|---------------------------------|---------------------------------|
| <i>Target A ligand</i>                      | <i>Target B ligand</i> | <i>MACCSfp similarity score</i> | <i>ECFP4fp similarity score</i> |
| CHEMBL252164                                | CHEMBL252370           | 0.952                           | 1                               |
| CHEMBL3234764                               | CHEMBL252370           | 0.817                           | 1                               |
| CHEMBL3234768                               | CHEMBL252370           | 0.812                           | 1                               |
| CHEMBL3234774                               | CHEMBL252370           | 0.775                           | 1                               |
| CHEMBL3235113                               | CHEMBL252370           | 0.766                           | 1                               |
| CHEMBL3235112                               | CHEMBL252370           | 0.757                           | 1                               |
| CHEMBL3234767                               | CHEMBL252370           | 0.781                           | 0.947                           |
| CHEMBL3234765                               | CHEMBL252370           | 0.781                           | 0.947                           |
| CHEMBL3234766                               | CHEMBL252370           | 0.781                           | 0.947                           |
| CHEMBL3234775                               | CHEMBL252370           | 0.764                           | 0.946                           |
| CHEMBL3234773                               | CHEMBL252370           | 0.733                           | 0.946                           |
| CHEMBL3234771                               | CHEMBL252370           | 0.781                           | 0.921                           |
| CHEMBL3234776                               | CHEMBL252370           | 0.764                           | 0.921                           |
| CHEMBL3234772                               | CHEMBL252370           | 0.743                           | 0.919                           |
| CHEMBL3235115                               | CHEMBL252370           | 0.743                           | 0.895                           |
| CHEMBL3235118                               | CHEMBL252370           | 0.756                           | 0.875                           |
| CHEMBL3235108                               | CHEMBL252370           | 0.808                           | 0.872                           |
| CHEMBL3234779                               | CHEMBL252370           | 0.746                           | 0.872                           |
| CHEMBL3234778                               | CHEMBL252370           | 0.736                           | 0.872                           |
| CHEMBL3235116                               | CHEMBL252370           | 0.761                           | 0.868                           |

  

| <i>Hsp90 (Target A) vs B-Raf (Target B)</i> |                        |                                 |                                 |
|---------------------------------------------|------------------------|---------------------------------|---------------------------------|
| <i>Target A ligand</i>                      | <i>Target B ligand</i> | <i>MACCSfp similarity score</i> | <i>ECFP4fp similarity score</i> |
| CHEMBL3234763                               | CHEMBL524445           | 0.609                           | 0.429                           |
| CHEMBL3234763                               | CHEMBL498344           | 0.627                           | 0.4                             |

|               |               |       |       |
|---------------|---------------|-------|-------|
| CHEMBL3234763 | CHEMBL521562  | 0.627 | 0.4   |
| CHEMBL3234760 | CHEMBL498487  | 0.636 | 0.372 |
| CHEMBL3234761 | CHEMBL498487  | 0.636 | 0.366 |
| CHEMBL3235118 | CHEMBL524445  | 0.6   | 0.36  |
| CHEMBL3234762 | CHEMBL497671  | 0.632 | 0.357 |
| CHEMBL3234758 | CHEMBL498487  | 0.636 | 0.341 |
| CHEMBL3234763 | CHEMBL498317  | 0.634 | 0.341 |
| CHEMBL3234763 | CHEMBL497671  | 0.6   | 0.341 |
| CHEMBL3234759 | CHEMBL498487  | 0.636 | 0.333 |
| CHEMBL3234762 | CHEMBL498487  | 0.623 | 0.333 |
| CHEMBL3235114 | CHEMBL1822255 | 0.64  | 0.321 |
| CHEMBL3234763 | CHEMBL524640  | 0.627 | 0.319 |
| CHEMBL3234763 | CHEMBL498343  | 0.627 | 0.319 |
| CHEMBL3234763 | CHEMBL498487  | 0.638 | 0.318 |
| CHEMBL3234762 | CHEMBL525191  | 0.6   | 0.31  |
| CHEMBL3235112 | CHEMBL1822255 | 0.633 | 0.309 |
| CHEMBL3235113 | CHEMBL1822255 | 0.628 | 0.309 |
| CHEMBL3234764 | CHEMBL1822255 | 0.622 | 0.309 |

***B-Raf (Target A) vs PDHK1 (Target B)***

| <b><i>Target A ligand</i></b> | <b><i>Target B ligand</i></b> | <b><i>MACCSfp<br/>similarity score</i></b> | <b><i>ECFP4fp<br/>similarity score</i></b> |
|-------------------------------|-------------------------------|--------------------------------------------|--------------------------------------------|
| CHEMBL498468                  | CHEMBL192894                  | 0.625                                      | 0.462                                      |
| CHEMBL498467                  | CHEMBL192894                  | 0.6                                        | 0.423                                      |
| CHEMBL1822258                 | CHEMBL3354226                 | 0.608                                      | 0.419                                      |
| CHEMBL1822262                 | CHEMBL3354226                 | 0.608                                      | 0.405                                      |
| CHEMBL1822256                 | CHEMBL3354226                 | 0.608                                      | 0.405                                      |
| CHEMBL1822257                 | CHEMBL3354226                 | 0.608                                      | 0.405                                      |
| CHEMBL1822261                 | CHEMBL3354226                 | 0.6                                        | 0.405                                      |
| CHEMBL1822259                 | CHEMBL3354226                 | 0.608                                      | 0.395                                      |
| CHEMBL1822265                 | CHEMBL3354226                 | 0.627                                      | 0.372                                      |
| CHEMBL1822097                 | CHEMBL3354226                 | 0.616                                      | 0.372                                      |
| CHEMBL1822260                 | CHEMBL3354226                 | 0.608                                      | 0.372                                      |
| CHEMBL1822264                 | CHEMBL3354226                 | 0.6                                        | 0.372                                      |
| CHEMBL1822092                 | CHEMBL3354226                 | 0.6                                        | 0.372                                      |
| CHEMBL1822096                 | CHEMBL3354650                 | 0.629                                      | 0.36                                       |
| CHEMBL1822097                 | CHEMBL3354225                 | 0.622                                      | 0.356                                      |
| CHEMBL1822095                 | CHEMBL3354226                 | 0.616                                      | 0.356                                      |
| CHEMBL1822071                 | CHEMBL3354650                 | 0.685                                      | 0.354                                      |
| CHEMBL1822072                 | CHEMBL3354650                 | 0.667                                      | 0.354                                      |
| CHEMBL1822097                 | CHEMBL3354650                 | 0.625                                      | 0.354                                      |
| CHEMBL1822096                 | CHEMBL3354226                 | 0.6                                        | 0.348                                      |

Moreover, 2D fingerprints-based estimations specifically focussing on the amide substituents of the selected phenyl-triazole and phenyl-isoxazole inhibitors allowed to identify significant similarity with some of the phenyl-3-sulfonamide and phenyl-3-sulfamide chemical moieties of B-Raf ligands (**Table B**).

**Table B:** Top20- scoring 2D similarity records obtained from the comparison of amide substituents of the selected Hsp90, PDHK1 ad B-Raf ligands. As shown in the table several substituents have

reported ECFP4 values above commonly accepted similarity thresholds.<sup>[6]</sup> Amide substituents are identified by means of their respective ChEMBL IDs.

| <b>Hsp90 (Target A) vs PDHK1 (Target B)</b> |                        |                                 |                                 |
|---------------------------------------------|------------------------|---------------------------------|---------------------------------|
| <b>Target A ligand</b>                      | <b>Target B ligand</b> | <b>MACCSfp similarity score</b> | <b>ECFP4fp similarity score</b> |
| CHEMBL3234772                               | CHEMBL252370           | 1                               | 1                               |
| CHEMBL3235112                               | CHEMBL252370           | 0.692                           | 0.889                           |
| CHEMBL3235113                               | CHEMBL252370           | 0.69                            | 0.889                           |
| CHEMBL3235115                               | CHEMBL3354229          | 0.579                           | 0.833                           |
| CHEMBL3235115                               | CHEMBL3354655          | 0.564                           | 0.769                           |
| CHEMBL3235115                               | CHEMBL3354651          | 0.511                           | 0.714                           |
| CHEMBL3235115                               | CHEMBL3354650          | 0.415                           | 0.714                           |
| CHEMBL3235118                               | CHEMBL252370           | 0.439                           | 0.7                             |
| CHEMBL3235117                               | CHEMBL3354229          | 0.356                           | 0.692                           |
| CHEMBL3234759                               | CHEMBL3354228          | 0.667                           | 0.684                           |
| CHEMBL3235116                               | CHEMBL3354229          | 0.674                           | 0.667                           |
| CHEMBL3235115                               | CHEMBL3354656          | 0.595                           | 0.667                           |
| CHEMBL3234759                               | CHEMBL3354227          | 0.605                           | 0.619                           |
| CHEMBL3234759                               | CHEMBL3354652          | 0.59                            | 0.619                           |
| CHEMBL3234772                               | CHEMBL3354651          | 0.413                           | 0.615                           |
| CHEMBL3235113                               | CHEMBL3354651          | 0.574                           | 0.571                           |
| CHEMBL3235114                               | CHEMBL3354229          | 0.538                           | 0.571                           |
| CHEMBL3235112                               | CHEMBL3354651          | 0.438                           | 0.571                           |
| CHEMBL3234758                               | CHEMBL3354228          | 0.595                           | 0.565                           |
| CHEMBL3234759                               | CHEMBL3354654          | 0.511                           | 0.545                           |
| <b>B-Raf (Target A) vs Hsp90 (Target B)</b> |                        |                                 |                                 |
| <b>Target A ligand</b>                      | <b>Target B ligand</b> | <b>MACCSfp similarity score</b> | <b>ECFP4fp similarity score</b> |
| CHEMBL1822093                               | CHEMBL3234759          | 0.233                           | 0.37                            |
| CHEMBL1822258                               | CHEMBL3234759          | 0.18                            | 0.345                           |
| CHEMBL1822093                               | CHEMBL3234758          | 0.279                           | 0.323                           |
| CHEMBL1822261                               | CHEMBL3234759          | 0.234                           | 0.321                           |
| CHEMBL1822262                               | CHEMBL3234759          | 0.219                           | 0.321                           |
| CHEMBL1822081                               | CHEMBL3234759          | 0.188                           | 0.321                           |
| CHEMBL1822083                               | CHEMBL3234759          | 0.188                           | 0.321                           |
| CHEMBL1822082                               | CHEMBL3234759          | 0.188                           | 0.321                           |
| CHEMBL1822257                               | CHEMBL3234759          | 0.18                            | 0.321                           |
| CHEMBL1822260                               | CHEMBL3234759          | 0.18                            | 0.321                           |
| CHEMBL1822107                               | CHEMBL3234759          | 0.148                           | 0.321                           |
| CHEMBL1822098                               | CHEMBL3234759          | 0.19                            | 0.31                            |
| CHEMBL1822102                               | CHEMBL3234759          | 0.188                           | 0.31                            |
| CHEMBL1822259                               | CHEMBL3234759          | 0.18                            | 0.31                            |
| CHEMBL1822095                               | CHEMBL3234759          | 0.148                           | 0.31                            |
| CHEMBL1822258                               | CHEMBL3234758          | 0.226                           | 0.303                           |
| CHEMBL1822109                               | CHEMBL3234759          | 0.286                           | 0.3                             |
| CHEMBL2047870                               | CHEMBL3234759          | 0.188                           | 0.3                             |
| CHEMBL1822093                               | CHEMBL3234759          | 0.233                           | 0.37                            |
| CHEMBL1822258                               | CHEMBL3234759          | 0.18                            | 0.345                           |
| <b>B-Raf (Target A) vs PDHK1 (Target B)</b> |                        |                                 |                                 |

| <i>Target A ligand</i> | <i>Target B ligand</i> | <i>MACCSfp similarity score</i> | <i>ECFP4fp similarity score</i> |
|------------------------|------------------------|---------------------------------|---------------------------------|
| CHEMBL1822259          | CHEMBL3354224          | 0.377                           | 0.519                           |
| CHEMBL2047869          | CHEMBL3354224          | 0.35                            | 0.519                           |
| CHEMBL1822258          | CHEMBL3354224          | 0.377                           | 0.5                             |
| CHEMBL2047878          | CHEMBL3354224          | 0.411                           | 0.481                           |
| CHEMBL2047877          | CHEMBL3354224          | 0.411                           | 0.481                           |
| CHEMBL2047876          | CHEMBL3354224          | 0.393                           | 0.481                           |
| CHEMBL1822260          | CHEMBL3354224          | 0.377                           | 0.481                           |
| CHEMBL2047879          | CHEMBL3354224          | 0.411                           | 0.464                           |
| CHEMBL2047876          | CHEMBL3354226          | 0.357                           | 0.458                           |
| CHEMBL2047878          | CHEMBL3354226          | 0.351                           | 0.458                           |
| CHEMBL2047877          | CHEMBL3354226          | 0.351                           | 0.458                           |
| CHEMBL2047869          | CHEMBL3354653          | 0.391                           | 0.452                           |
| CHEMBL1822259          | CHEMBL3354653          | 0.354                           | 0.452                           |
| CHEMBL2047870          | CHEMBL3354224          | 0.339                           | 0.448                           |
| CHEMBL1822088          | CHEMBL3354224          | 0.415                           | 0.444                           |
| CHEMBL2047879          | CHEMBL3354226          | 0.351                           | 0.44                            |
| CHEMBL2047870          | CHEMBL3354653          | 0.4                             | 0.438                           |
| CHEMBL1822258          | CHEMBL3354653          | 0.354                           | 0.438                           |
| CHEMBL1822094          | CHEMBL3354224          | 0.471                           | 0.429                           |

## References

- [1] T. Meng, D. Zhang, Z. Xie, T. Yu, S. Wu, L. Wyder, U. Regenass, K. Hilpert, M. Huang, M. Geng, J. Shen, *J. Med. Chem.* **2014**, *57*, 9832–9843.
- [2] M. Taddei, S. Ferrini, L. Giannotti, M. Corsi, F. Manetti, G. Giannini, L. Vesci, F. M. Milazzo, D. Alloatti, M. B. Guglielmi, M. Castorina, M. L. Cervoni, M. Barbarino, R. Foderà, V. Carollo, C. Pisano, S. Armaroli, W. Cabri, *J. Med. Chem.* **2014**, *57*, 2258–2274.
- [3] J. D. Hansen, J. Grina, B. Newhouse, M. Welch, G. Topalov, N. Littman, M. Callejo, S. Gloor, M. Martinson, E. Laird, B. J. Brandhuber, G. Vigers, T. Morales, R. Woessner, N. Randolph, J. Lyssikatos, A. Olivero, *Bioorg. Med. Chem. Lett.* **2008**, *18*, 4692–4695.
- [4] S. Mathieu, S. N. Gradl, L. Ren, Z. Wen, I. Aliagas, J. Gunzner-Toste, W. Lee, R. Pulk, G. Zhao, B. Alicke, J. W. Boggs, A. J. Buckmelter, E. F. Choo, V. Dinkel, S. L. Gloor, S. E. Gould, J. D. Hansen, G. Hastings, G. Hatzivassiliou, E. R. Laird, D. Moreno, Y. Ran, W. C. Voegtli, S. Wenglowsky, J. Grina, J. Rudolph, *J. Med. Chem.* **2012**, *55*, 2869–2881.
- [5] S. Wenglowsky, K. A. Ahrendt, A. J. Buckmelter, B. Feng, S. L. Gloor, S. Gradl, J. Grina, J. D. Hansen, E. R. Laird, P. Lunghofer, S. Mathieu, D. Moreno, B. Newhouse, L. Ren, T. Risom, J. Rudolph, J. Seo, H. L. Sturgis, W. C. Voegtli, Z. Wen, *Bioorg. Med. Chem. Lett.* **2011**, *21*, 5533–5537.
- [6] S. Jasial, Y. Hu., M. Vogt, J. Bajorath, *F1000Res.* **2016**, *5*, Chem Inf Sci-59.
- [7] A. Gaulton, A. Hersey, M. Nowotka, A. P. Bento, J. Chambers, D. Mendez, P. Mutowo, F. Atkinson, L. J. Bellis, E. Cibrián-Uhalte, M. Davies, N. Dedman, A. Karlsson, M.P. Magariños, J.P. Overington, G. Papadatos, I. Smit I, A.R. Leach, *Nucleic Acids Res.*, **2017**, *45(D1)*, D945-D954.
